# Supplementary material for: In situ functionalization of hollow mesoporous hydroxyapatite with thermal-responsive on–off gates in supercritical CO2
Source: Royal Society of Chemistry journal article supplement (doi:10.1039/c5ra13630j), 2015-01-01
Supplement: c5ra13630j1.pdf [file c5ra13630j1.pdf]

## Electronic supplementary information (ESI):

### ***In situ* functionalization of hollow mesoporous hydroxyapatite with thermal-responsive on-off gates in supercritical CO<sub>2</sub>**

Qiong Wu, Jun Shi\*, Jing Wei, Liu Yang and Shaokui Cao\*

#### **Figure Captions:**

**Fig. S1** Preparation of pH-/thermal- dual responsive aliphatic PUA.

**Fig. S2** SEM micrographs of CaCO<sub>3</sub> (A1) and HAP microparticles (B1), corresponding EDX spectra of CaCO<sub>3</sub> (A2) and HAP microparticles (B2).

**Fig. S3** SEM image of PUA-g-H-HAP microparticles (A) and corresponding diameter dispersity bar diagram (B).

**Fig. S4** XRD curves of H-HAP microparticles and thermal-responsive PUA-g-H-HAP microparticles.

**Fig. S5** Plots of  $\ln(M_t/M_\infty)$  versus  $\ln t$  for H-HAP and PUA-g-H-HAP microparticles at pH 7.4 and 37 °C (A), and plots of  $\ln(M_t/M_\infty)$  versus  $\ln t$  for PUA-g-H-HAP microparticles at different pH values and temperatures (B).

**Table S1** Parameters  $n$  and  $R^2$  determined by Eq. (1) for the DOX release of samples at different release conditions

| Microparticles | Release condition | $k$   | $n$   | $R^2$ |
|----------------|-------------------|-------|-------|-------|
| H-HAP          | pH 7.4, 37 °C     | 0.234 | 0.272 | 0.946 |
| PUA-g-H-HAP    | pH 7.4, 37 °C     | 0.092 | 0.349 | 0.921 |
| PUA-g-H-HAP    | pH 2.1, 37 °C     | 0.271 | 0.481 | 0.974 |
| PUA-g-H-HAP    | pH 7.4, 55 °C     | 0.292 | 0.240 | 0.980 |

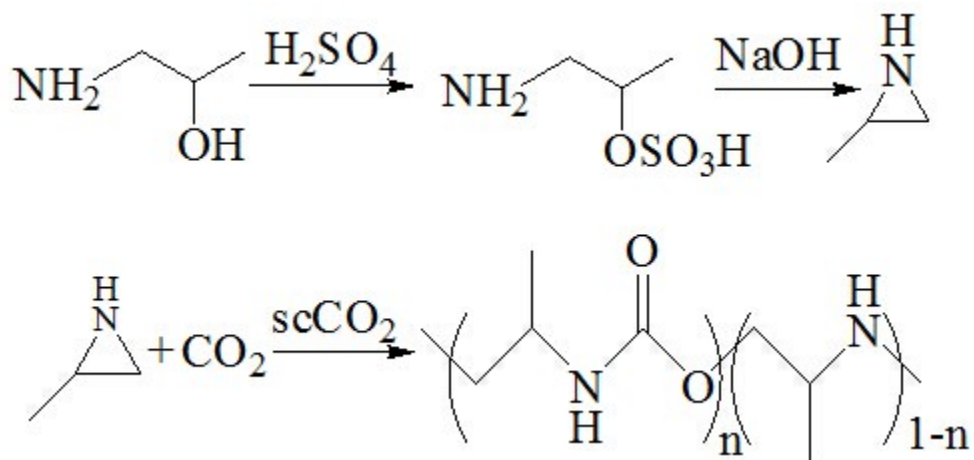

**Fig. S1**

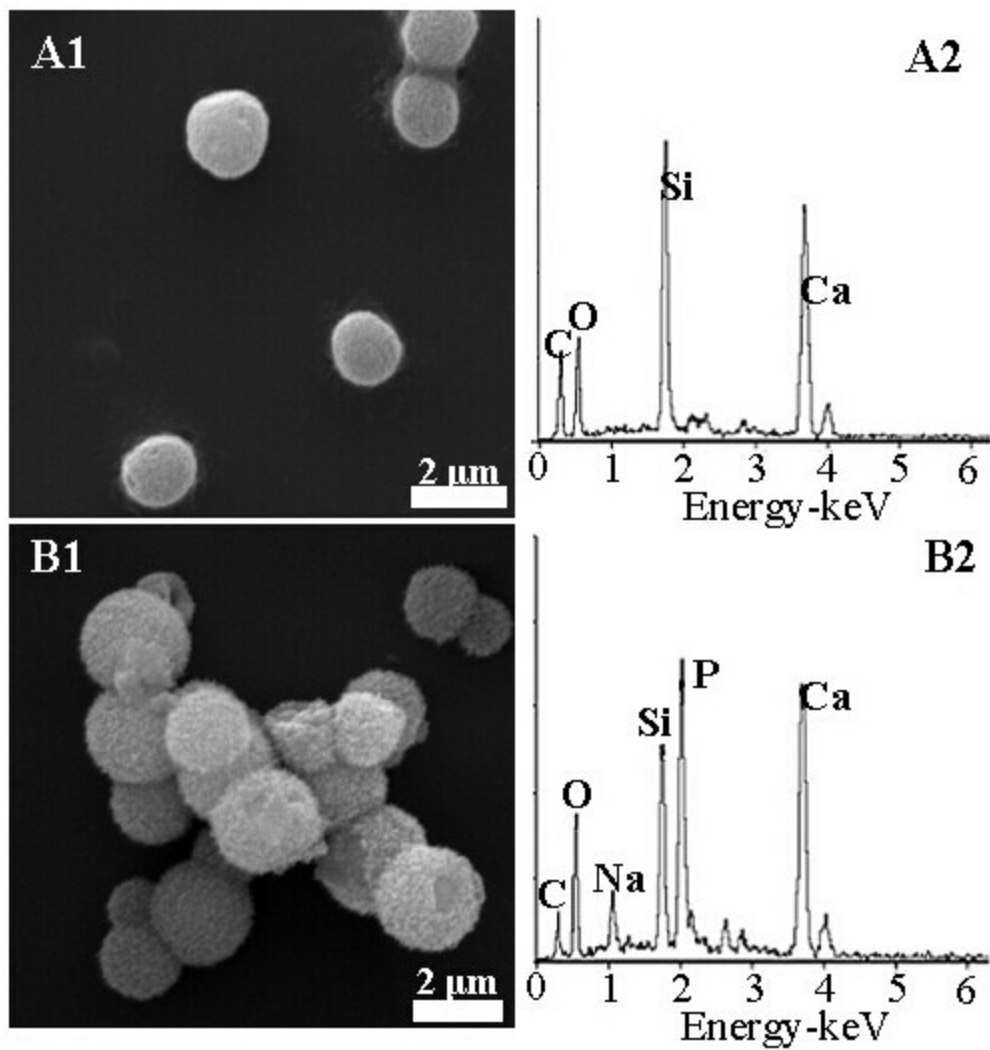

Fig. S2

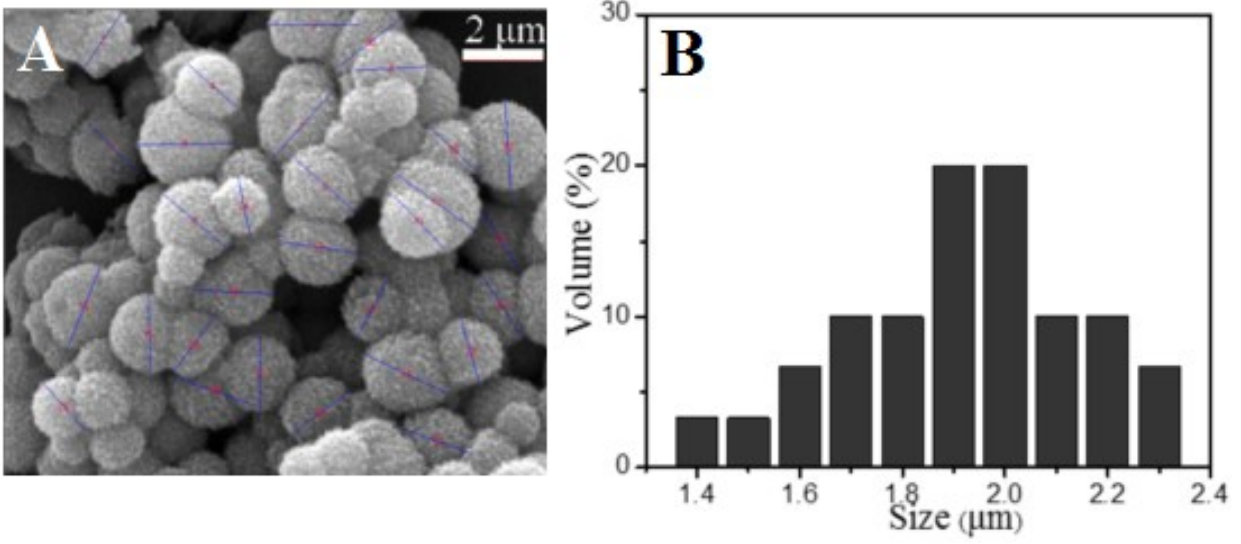

Fig. S3

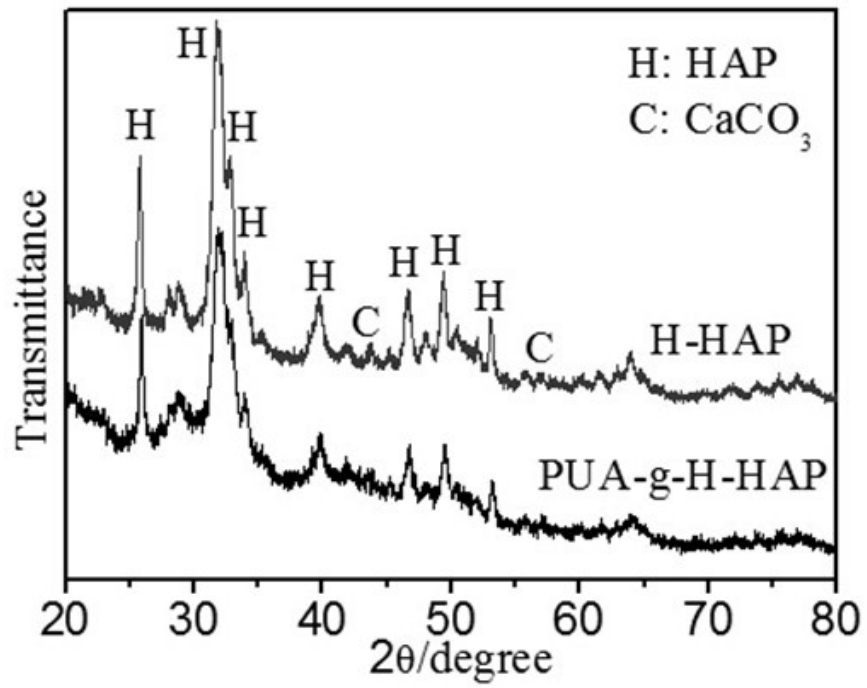

Fig. S4

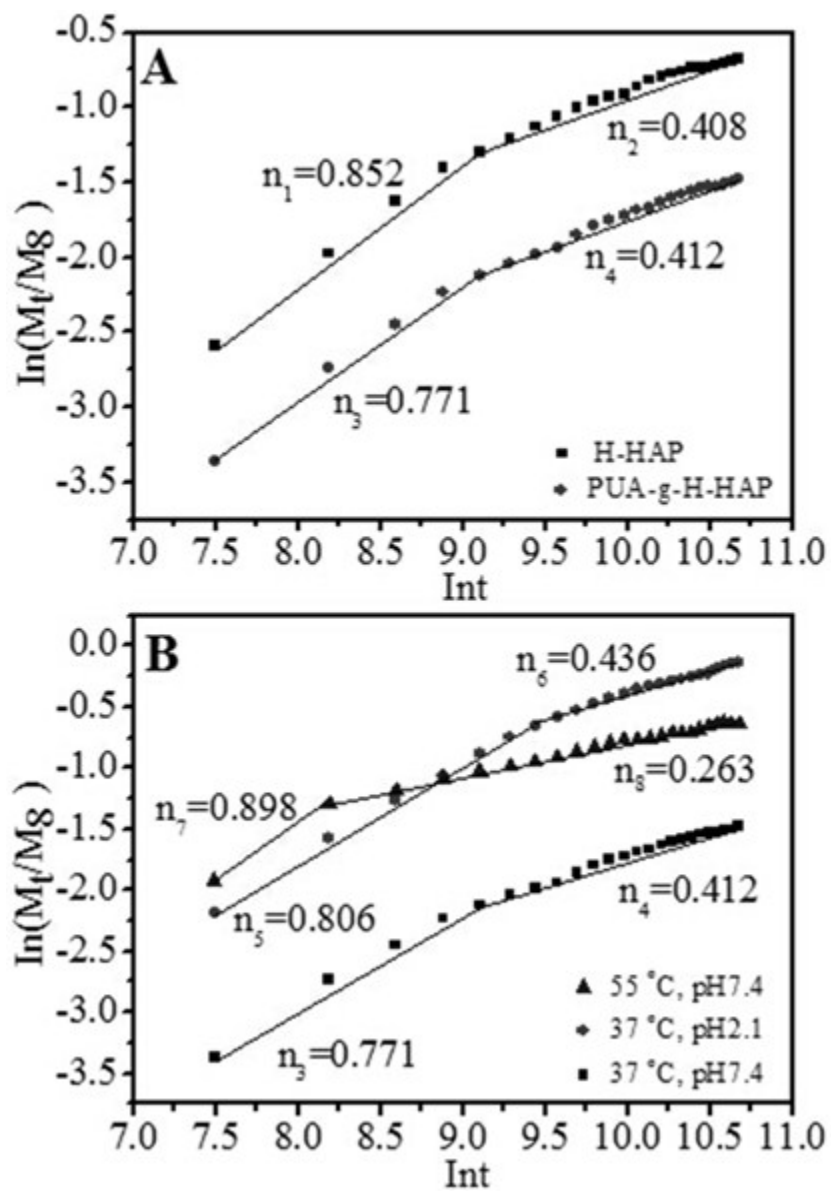

Fig. S5
